# Supplementary material for: A 28 Day Clinical Assessment of a Lactic Acid-containing Antimicrobial Intimate Gel Wash Formulation on Skin Tolerance and Impact on the Vulvar Microbiome
Source: MDPI journal article supplement (doi:10.3390/antibiotics9020055), 2020-02-01
Supplement: s1 [file s1]

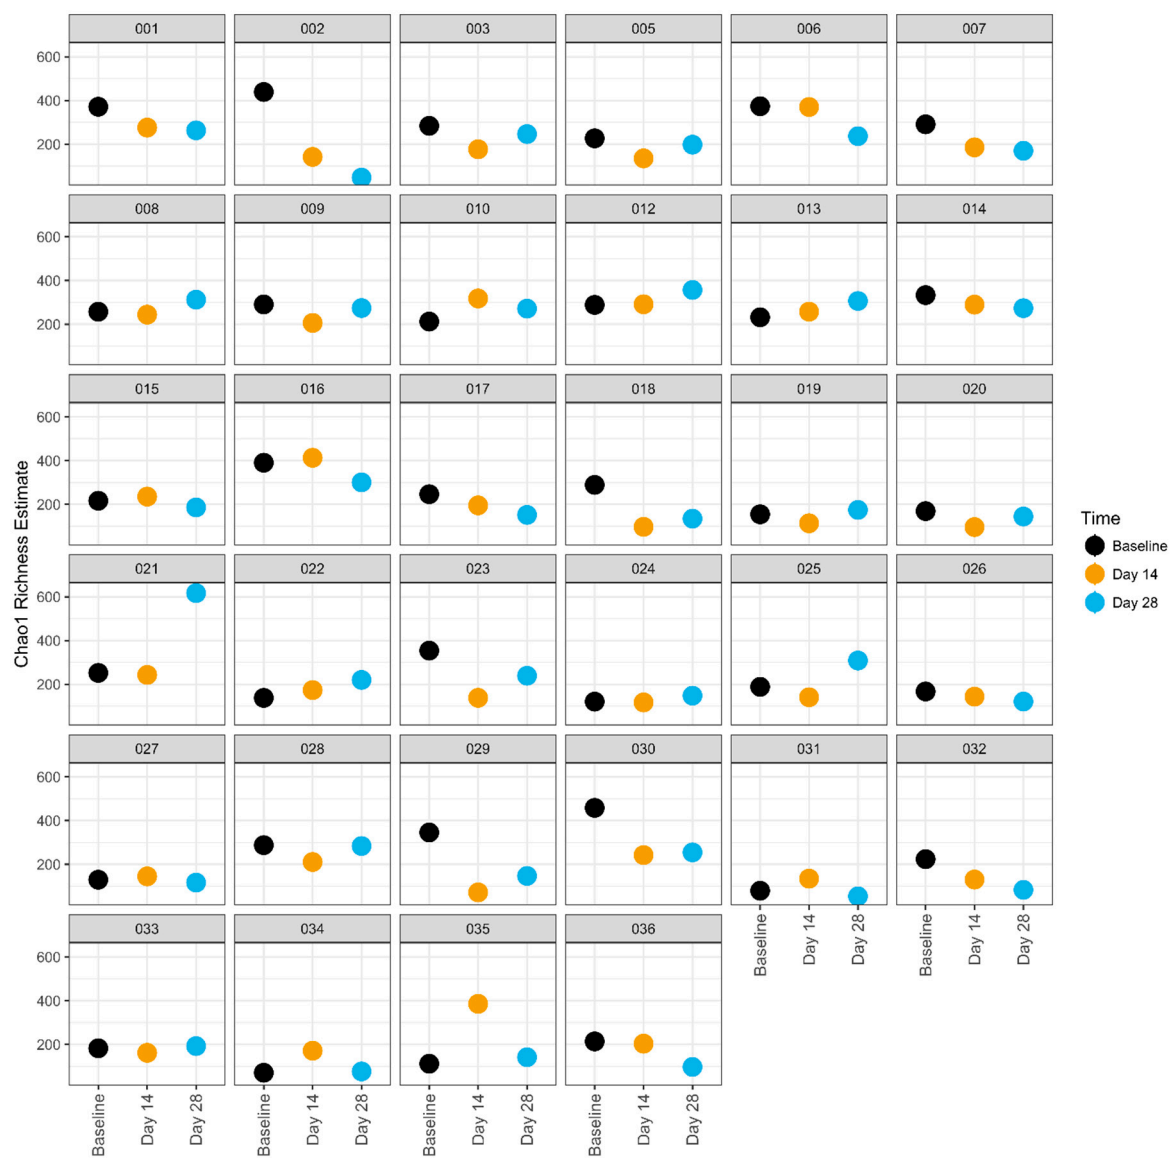

**Figure S1: Individual Subject Bacteria Chao1 Richness Plot**

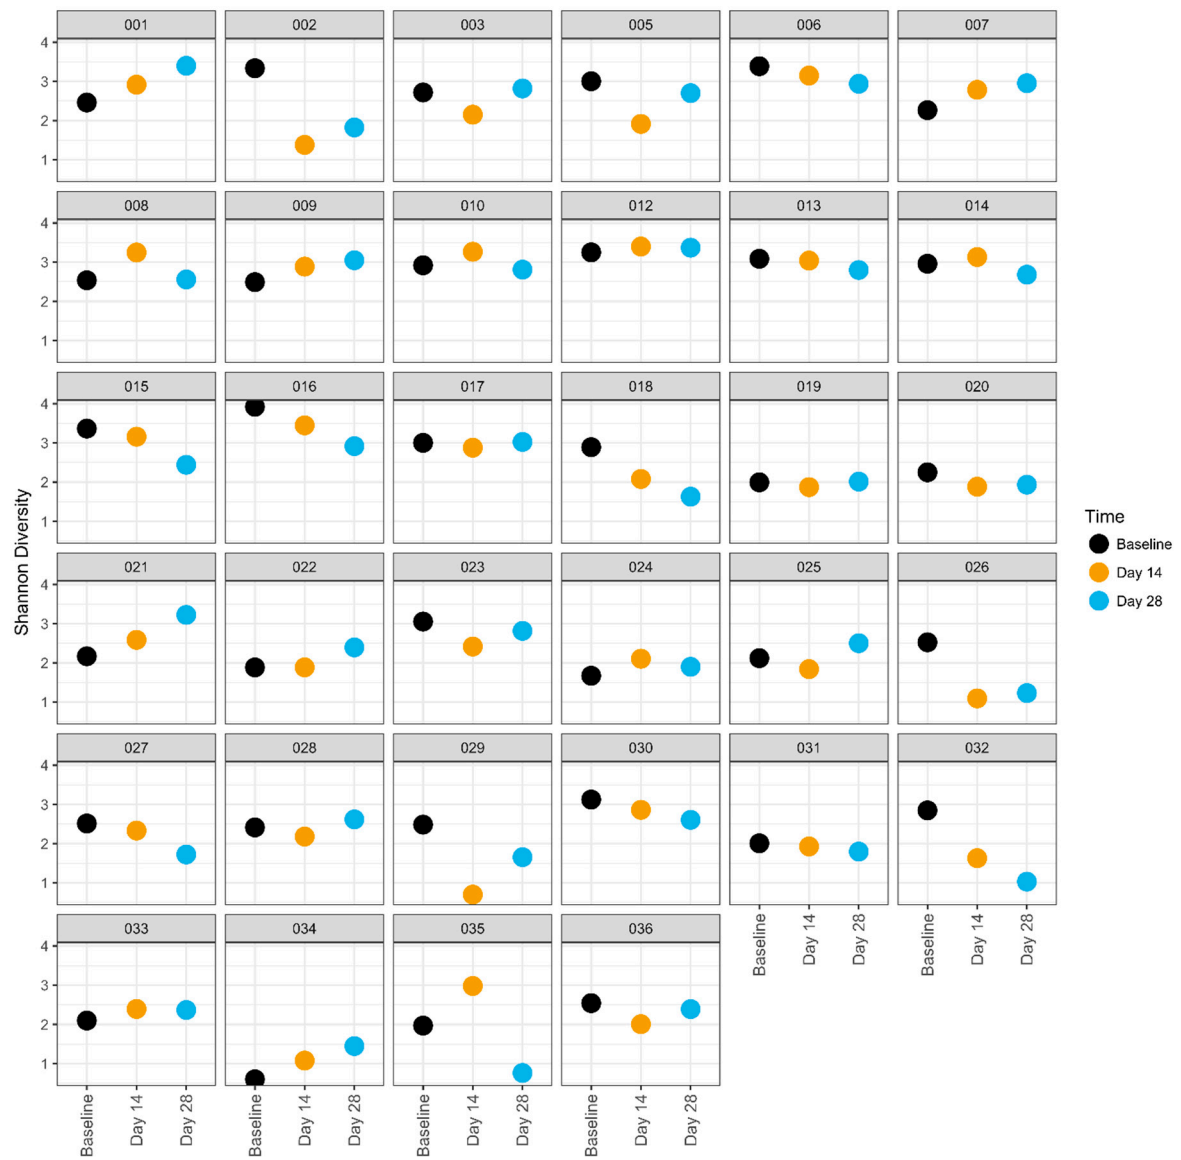

Figure S2: Individual Subject Bacteria Shannon Diversity Plot

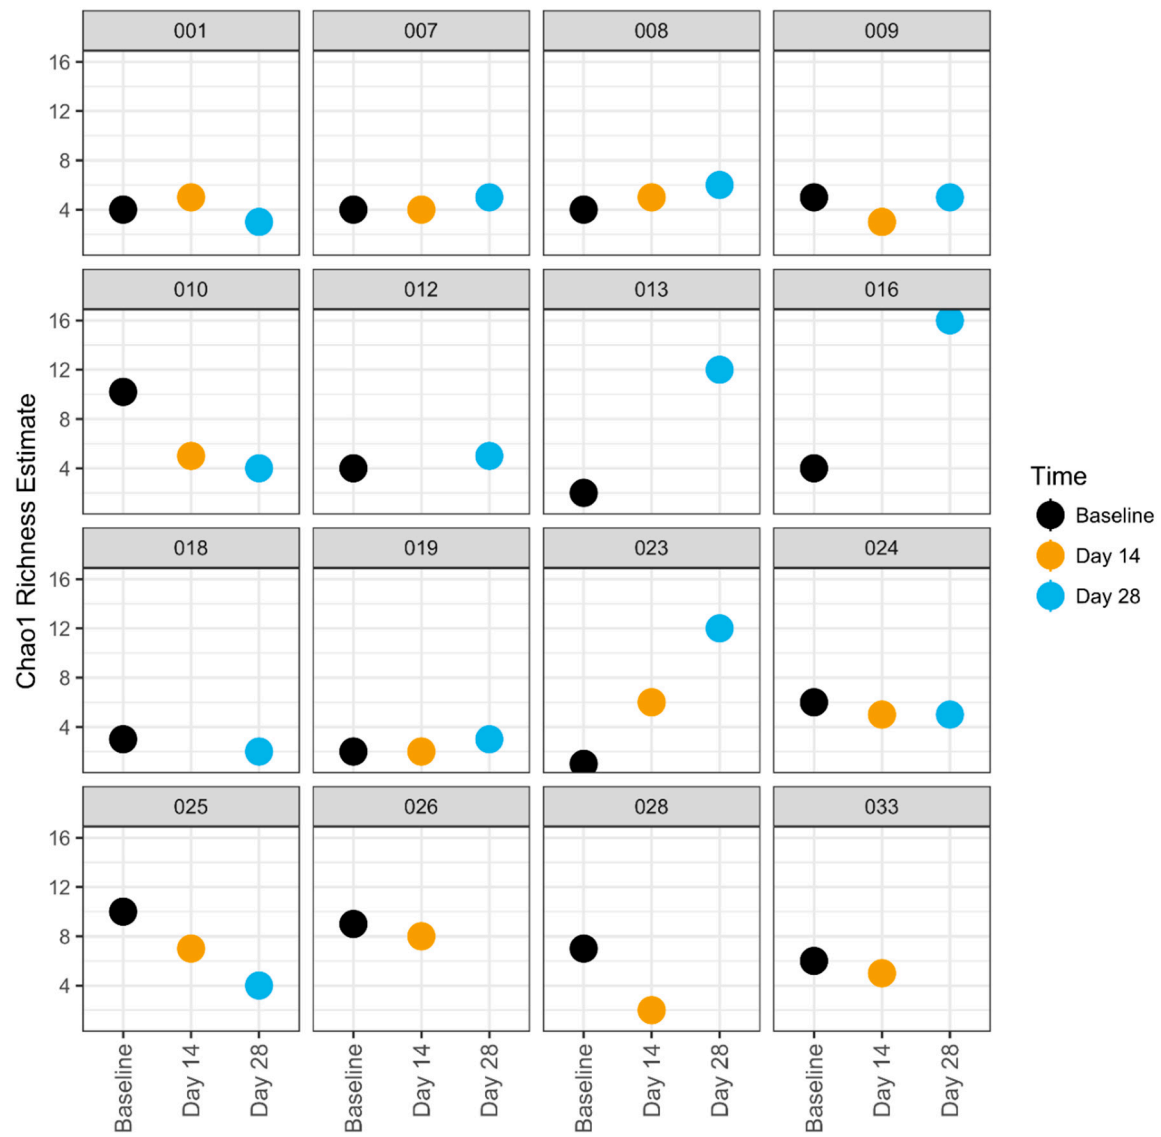

Figure S3: Individual Subject Fungal Chao1 Richness Plot

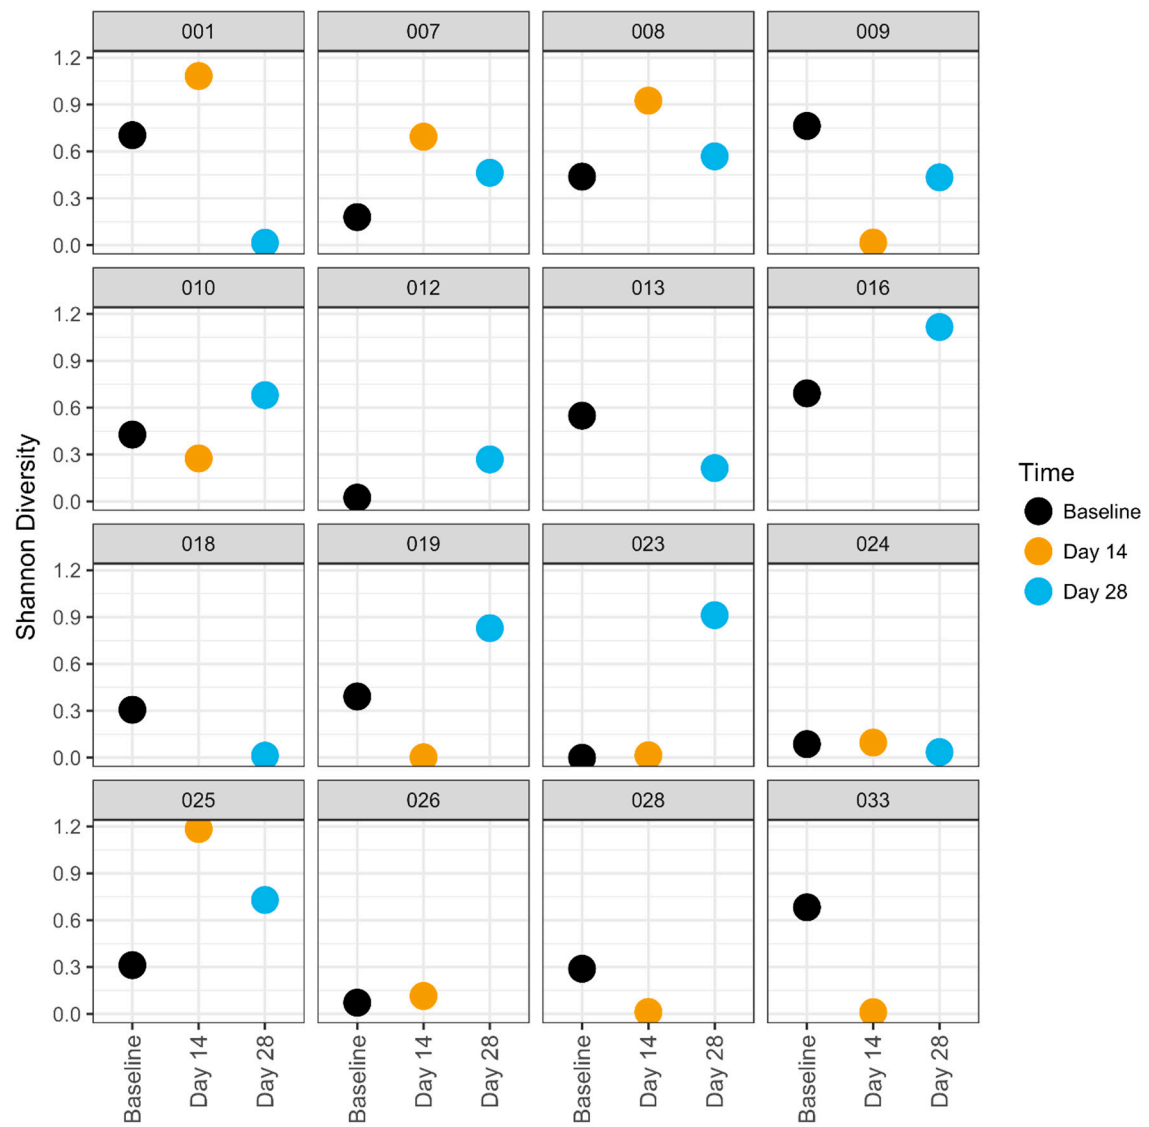

**Figure S4: Individual Subject Fungal Shannon Diversity Plot**
